1 Title: The drivers and consequences of unstable *Plasmodium* dynamics: A long-term study of  
2 three malaria species infecting a tropical lizard

3

4 Running title: Long-term drivers and consequences of parasite dynamics

5

6 Luisa Otero<sup>1</sup>, Jos. J. Schall<sup>2</sup>, Vernaliz Cruz<sup>1</sup>, Kristen Aaltonen<sup>3</sup>, Miguel A. Acevedo<sup>1</sup>

7 1. Department of Biology, University of Puerto Rico, Río Piedras, Puerto Rico

8 2. Department of Biology, University of Vermont, Burlington, Vermont, USA.

9 3. Akins High School, Austin, TX, USA

10 Corresponding author: Miguel A. Acevedo, Department of Biology, University of Puerto Rico—

11 Río Piedras. Email: miguel.acevedo7@upr.edu

12

13 ABSTRACT

14 1) The dynamics of vector-borne parasites are driven by interactions between factors intrinsic to  
15 the parasite, its host, as well as environmental fluctuations. Understanding these interactions  
16 requires a long-term view, especially to predict the consequences of climate change on parasite  
17 dynamics.

18 2) The goal of this study is to evaluate temporal fluctuations in individual probability of  
19 infection, its environmental drivers and consequences for host body condition, of three malaria  
20 parasites (*Plasmodium azurophilum*, *P. leucocytica*, and *P. floridense*) infecting the lizard,  
21 *Anolis gundlachi*, in the rainforest of Puerto Rico.

22 3) We conducted 13 surveys totaling  $N > 8000$  lizards over 26 years. During the early years of  
23 the study, the lizard's probability of infection by all three *Plasmodium* species appeared stable  
24 despite disturbances from short droughts and small to moderate hurricanes.

25 4) Over a longer timescale, we found that the individual lizard probability of infection and overall  
26 prevalence varied significantly over the years, and this fluctuation was driven in non-linear ways by  
27 variations in temperature and rainfall. The probability of infection was maximized at intermediate levels  
28 of temperature and precipitation. This temporal variability in *Plasmodium* prevalence driven by  
29 environmental factors had two important consequences. First, temperature-mediated a decrease in body  
30 condition in infected female lizards relative to non-infected ones. Second, *Plasmodium* parasite species  
31 composition varied through time.

32 5) Overall, the results show how environmental conditions, such a severe drought, can drive  
33 disease dynamics outside of their apparent stable equilibrium and mediate the potential negative

34 effects of parasite infection on the host. Our results also emphasize the need for long-term  
35 studies to reveal host-parasite dynamics, their drivers and consequences.

## 36 **1 INTRODUCTION**

37 Malaria parasites (*Plasmodium* and related genera) are a diverse group exploiting  
38 thousands of vertebrate host species including mammals, squamate reptiles, and especially birds  
39 on all warm continents (Martinsen, Perkins, & Schall 2008; Tempelton et al., 2016). A  
40 venerable, and vexing, issue in the study of human malaria centers on the variation over time and  
41 space in prevalence patterns. For example, in the early 20<sup>th</sup> century, European malaria waxed  
42 and waned seemingly independent of control efforts, even contrary to control programs, for  
43 many decades, appearing "autonomous, as though there were an inherent periodicity in the  
44 dreadful scourge" (Hackett, 1937). A recent study examined > 50,000 prevalence surveys in  
45 sub-Saharan Africa since 1900 (Snow et al., 2017) and likewise found no ready explanation for  
46 changes in parasite abundance. Understanding the interplay between the parasites, their hosts,  
47 and the abiotic environment has implications both for human public health, but also for wildlife  
48 conservation. For example, a single strain of *Plasmodium relictum*, has devastated the endemic  
49 birds of the Hawaiian islands (Beadell et al., 2006), and climate change has now brought the  
50 parasite to northern latitudes and bird species previously not infected by *Plasmodium* (Martinsen,  
51 Sidor, Flint, Colley & Pokras, 2017).

52 One pointed question focuses on the stability in prevalence patterns; that is, are the  
53 dynamics of these parasite-host systems stable through time and robust to environmental  
54 fluctuations (MacDonald, 1952)? Classic theoretical models on malaria predict temporally stable  
55 dynamics (MacDonald 1952; Aron & May, 1982)—broadly defined here as infection prevalence  
56 consistently within a small range and robust to minor environmental fluctuations (*sensu* Schall,

57 Pearson & Perkins, 2000). Large environmental changes, though, are predicted to bump the  
58 stable endemic pattern to unpredictable outcomes (Chiyaka et al., 2013). With ongoing climate  
59 changes in temperature and rainfall patterns, could the prevalence of malaria parasites be driven  
60 into such unstable patterns? What are the potential consequences for their wildlife hosts? The  
61 ecological theory of such multiple stable states predicts such sudden shifts with sometimes even  
62 minor environmental changes (reviewed in Petraitis, 2013).

63 Malaria parasites are vector-borne, and thus sensitive to environmental fluctuations  
64 (Altizer, Ostfeld, Johnson, Kutz & Harvell, 2013; Campbell-Lendrum, Manga, Bagayoko, &  
65 Sommerfeld, 2015) through the effect on the life stages of the vertebrate host or vector  
66 (Paaijmans, Blanford, Bell, Blanford, Read & Thomas, 2010; Mordecai et al., 2013). Expected  
67 temperature increases of 1–5 °C may broaden the geographic range of vectors (e.g. Loiseau et  
68 al., 2012; Martinsen et al., 2017) and increase vector biting and parasite replication rates  
69 promoting transmission (Pascual, Ahumada, Chaves, Rodo & Bouma, 2006). However,  
70 increasing temperature may also increase vector mortality resulting in an opposite effect. Other  
71 studies found little effect of environmental factors on vector-borne disease prevalence (e.g.  
72 Pulgarín, Gómez, Robinson, Ricklefs, & Cadena, 2017). Therefore, the relationship between  
73 abiotic factors and pathogen transmission in the context of climate change remains an important  
74 open question in disease ecology, including for malaria parasites (Lively, de Roode, Duffy,  
75 Graham & Koskella, 2014).

76 Only a long-term view, with long data series, will allow a better understanding of  
77 climate-driven changes in ecological processes (Lindenmayer & Likens, 2009; Clutton-Brock &  
78 Sheldon, 2010) including parasite dynamics (Harvell et al., 2002). Most long-term studies on  
79 malaria parasites focus on those of human medical importance and are influenced by public

80 health efforts to reduce parasite prevalence. Thus, control efforts result in changing  
81 environments for the parasites, superimposed on natural fluctuations. Long-term studies of  
82 malaria parasites in wildlife hosts present an ideal alternative. Such studies are scarce, but have  
83 offered intriguing, but perplexing findings. For example, studies on avian malaria found either  
84 that increasing temperature was associated with an increased risk of infection (Garmszegi, 2011,  
85 Samuel et al., 2011), or no such effects (Bensch et al., 2007). Also, studies on avian systems  
86 found changes in the parasites' genetic lineages over > 10 years driven by weather changes  
87 (Fallon, Ricklefs, Latta & Bermingham, 2004; Wilkinson, Handel, Van Hemert, Loiseau &  
88 Sehgal, 2016), yet a study of lizard malaria showed a stable mix of parasite genotypes over 20  
89 lizard generations (Schall & St. Denis, 2013).

90 *Plasmodium* infection in lizards is a useful system to understand the interplay between  
91 environmental change and the stability of host-parasite interactions. Lizards are ectothermic  
92 hosts with short life spans that allow studying multiple generations in a short period of time.  
93 Two studies on lizard malaria found significant variation in parasite prevalence over time, one an  
94 ongoing study now spanning 40 years at a site in California USA (Schall & St. Denis 2013 and  
95 subsequent unpublished data), and another in Georgia, USA over five years (Jordan, 1964), with  
96 no correlation of changes in malaria prevalence with environmental variables in either system.  
97 In contrast, a study of three *Plasmodium* species coexisting in a single anole lizard species in  
98 Puerto Rico found apparent stable prevalence and relative proportion of the parasite species even  
99 with disruption of the forest habitat by two hurricane events (Schall, Pearson & Perkins, 2000).

100 Here we present a 26-year study of three lizard malaria parasites (*Plasmodium*  
101 *azuophilum*, *P. floridense*, and *P. leucocytica*) infecting *Anolis gundlachi* in the tropical  
102 rainforest of Puerto Rico. We leverage data assembled from 1990 to 1999 (Schall, Pearson &

103 Perkins, 2000), add extensive recent sampling, and reanalyze the data using statistical methods  
104 appropriate to a longer-term approach spanning 26 years. There are several notable features for  
105 this study: The lizard life span is typically one year. Therefore, the study covered 26 generations  
106 of the vertebrate host. The system has not been disturbed by any human intervention, such as  
107 parasite control efforts, logging or land-cover change. The parasite community includes three  
108 species exploiting the same host, and the dynamics of all three were followed over time. Changes  
109 in relative proportion of the *Plasmodium* species would be particularly interesting because *P.*  
110 *leucocytica* infects several classes of white blood cells and the other two infect erythrocytes, with  
111 possible complex competitive interactions. We used identical field and laboratory methods for  
112 the early vs. recent samples. Last, a well-defined measure of lizard health, body mass vs. length  
113 (Cox & Calsbeek, 2015), allows a measure of changes in host health condition over time.

114 We ask: (1) Was the individual probability of infection stable during the 26-year period?  
115 (2) If not, was the temporal variability driven by abiotic factors (e.g. temperature and  
116 precipitation), or were there secular trends apparently independent of environmental changes (the  
117 “autonomous” pattern of Hackett (1937)? (3) Do these environmental changes mediate the  
118 potential negative consequences of infection to the host body condition? (4) Was parasite species  
119 composition stable during this long-term period?

## 120 **2. MATERIALS AND METHODS**

### 121 **2.1. Study system, field sampling, and diagnostics**

122 We studied the lizard *Anolis gundlachi* (Figure 1a), and the three species of *Plasmodium*  
123 parasites that infect it: *P. azurophilum* (Figure 1b), *P. floridense* (Figure 1c), and *P. leucocytica*  
124 (Figure 1d) at the El Verde field station located at the Luquillo Experimental Forest, in Puerto  
125 Rico (central point N 18°19.263' - W 65°49.146'). The ecology of this site has been studied in

126 detail for decades (Reagan & Waide, 1996). *Anolis gundlachi* is a medium-sized lizard (mean  
127 snout-vent length of 58 mm, mean mass 5.4 g) and is the most common anole in the forest  
128 understory, reaching population sizes of 2000 ha<sup>-1</sup> (Reagan, 1996). This anole is among seven  
129 other species living at the site, but the other anoles are rarely infected (Schall, Pearson &  
130 Perkins, 2000). We sampled lizards during 13 periods over 26 years: summers (May-August)  
131 1990, 1996–1998, 2015, 2016, and winters (January-March) 1991, 1997, 1998, 1999, 2001, 2002  
132 and 2016.

133 To insure consistency over time we replicated rigorously the protocols of field sampling  
134 and diagnostics used in the original study by Schall, Pearson & Perkins (2000). Specifically, we  
135 consulted sketch maps of study sites made during the early years to sample the same sites within  
136 the forest (between 4 and 10 trails each year) and collect similar sample sizes ( $N > 650$  per  
137 survey). The experimental forest is well mapped, including a 16-ha plot with every tree identified  
138 and numbered, facilitating return to the earlier collection sites. To insure uniform scoring of  
139 blood films, LO and MAA worked with the initiator of the early samples (JJS) with a dual-  
140 viewing microscope to become proficient in the scoring of infected lizards and identification of  
141 the parasites.

142 We searched for anoles on tree trunks, branches, rocks, ground and other perches. We  
143 captured lizards by hand or noose and kept them in individual bags to transport them to the  
144 laboratory where we determined sex, measured snout to vent length (SVL), mass, and sampled  
145 blood using toe clipping (Schall, Pearson & Perkins, 2000). Toe clipping also ensures that  
146 individuals are not sampled more than once in a season. Captured lizards were released in the  
147 same areas where they were collected within 24 hours after capture. We made blood smears for  
148 each individual and kept dried blood samples in filter papers for future molecular analyses. We

149 fixed the smears using methanol (100%) and stained the slides using Giemsa stain at pH 7.5 for  
150 50 minutes following the protocol by Schall, Pearson & Perkins (2000). To determine if a lizard  
151 was infected we diagnosed each sample by scanning stained blood smears at 1000x. We spent 6–  
152 10 minutes examining the slides (Schall, Pearson & Perkins, 2000). Infection status was  
153 determined by examination of stained thin blood smears, and parasite species identified based on  
154 morphological traits and cell class infected (Telford, 2016).

## 155 **2.2 Environmental variables**

156 We compiled temperature and rainfall data from El Verde weather station records and  
157 estimated daily mean minimum, maximum, and variance of registered temperatures and rainfall  
158 30 and 120 days prior to the sampling month (Schall, Pearson & Perkins, 2000). Hurricane  
159 events occurred in September 1995 (two), July 1996, and September 1998. We did not included  
160 hurricanes *per se* in the analysis, but high rainfall marked those periods in the precipitation data.  
161 To estimate host body condition, we measured the snout-vent length (SVL) using a ruler and  
162 mass of each lizard using 20 and 30 g Pesolas scales.

## 163 **2.3 Analyses**

164 We followed Chamblerin (1890) approach of comparing multiple working hypotheses for each  
165 one of our four research questions. This approach contrasts with the more common Popperian  
166 approach where a single alternative hypothesis is compared against a null one. The key  
167 difference between the two approaches is that the multiple working hypotheses framework  
168 allows for the possibility that more than one hypotheses may be simultaneously true (Elliot &  
169 Brook, 2007; Betini, Avgar, & Fryxell, 2017). Here we operationalize this approach developing  
170 a list of *a priori* hypotheses for each of the questions, which are represented by a model. We



171 compared each model—including a null (intercept only) model—using Akaike Information  
172 Criterion adjusted for small sample sizes (AICc). The most parsimonious model has lowest  
173 AICc score. In the case of multiple models having similar low AICc scores, we use AIC weights  
174 to assess the relative contribution of each hypothesis to explain the observed relationship. We  
175 fitted all models using maximum likelihood and conducted model selection using the  
176 AICcmodavg package in R 3.0.3 (R Core Team, 2018).

177         To determine if the individual probability of infection was stable through the 26-year  
178 study period, we compared eight binomial models. These models (with exception of the null  
179 model) include season, sex, and/or SVL as covariates because Schall, Pearson, & Perkins (2000)  
180 found strong evidence showing that the probability of infection was higher in the summer than in  
181 the winter season. They also found that bigger males had a higher probability of infection than  
182 smaller males or females. We compared models predicting the probability of infection as a  
183 function of (1) SVL, year, and sex separately, (2) the additive effect of sex, SVL and season, (3)  
184 a similar model, but including an additive effect of year, (4) a model including sex, SVL and  
185 season with an interactive effect between sex and SVL, (5) a similar model including an additive  
186 effect of year, and (6) an intercept-only model that represented the null hypothesis that none of  
187 the variables explains the observed temporal variability in probability of infection (Table S1). If  
188 there was significant temporal variation in the dynamics, the most parsimonious model (lowest  
189 AICc score) would include the effect of sampling year.

190         We followed a similar model selection approach to test which environmental variables  
191 (i.e. rainfall and/or temperature) better predict the proportion of infected individuals through  
192 time. We compared 35 models that included various combinations of mean rainfall 30 days and  
193 120 days before the field sampling (Schall, Pearson & Perkins, 2000). These also included

194 models with the variance of rainfall or temperature 30 or 120 days before the field sampling  
195 (Vasseur et al., 2014). To allow for a possible non-linear effect we also fitted individual and  
196 additive models with a second-degree polynomial. Last, we fitted a null (intercept only) model  
197 to describe the case where none of the tested variables better explains the observed patterns in  
198 prevalence (Table S3).

199         To assess the relationship between environmental factors, infection status and body  
200 condition we estimated body condition using the residual index  $R_i$  (Cox & Calsbeek, 2015). We  
201 calculated this index using the residuals of the linear regression of log<sub>10</sub> mass on log<sub>10</sub> SVL.  
202 Lizards with positive residuals are heavier than average (better body condition), while lizards  
203 with negative residuals are skinnier relative to their SVL than average (Schall & Pearson, 2000).  
204 We made a separate analysis for each sex, including data from the years for which body mass  
205 and SVL data were available (1996, 1997, 1998, 2015, and 2016). Previous studies show that *A.*  
206 *gundlachi* lizards are particularly sensitive to maximum temperatures (Huey & Webster, 1976;  
207 Hertz et al., 1993) and cumulative rain (Schall & Pearson, 2000). Therefore, we compared 14  
208 models that predicted variability in body condition as a function of maximum temperature 30  
209 days of the census, cumulative rain six months before the survey, infection state and their  
210 additive combinations. To account for potential non-linear effects, we also compared models that  
211 incorporated a second-degree polynomial effect of temperature and rainfall. We also compared a  
212 null (intercept-only) model that represents the case where none of these variables explains  
213 variability in body condition (Tables S5, S7).

214         To assess changes in composition of the three *Plasmodium* species through time we  
215 compared 10 multinomial logit models in their ability to predict the individual probability of  
216 being non-infected or infected by one of three *Plasmodium* parasites (four categories; co-

217 infections were not considered because they were infrequent). This modeling approach is an  
218 extension of a logistic regression for multinomial response variables. We included sex and SVL  
219 in the models as controlling variables because these may influence the probability of infection by  
220 different *Plasmodium* species. We compared models including (1) the single effect of sex, SVL,  
221 or year; (2) models considering the additive and interactive effect of year and SVL; (3) a model  
222 considering the additive effect of sex and SVL; (4) the additive effect of these three variables,  
223 with either interactions of year with SVL, or sex. We also fitted a null (intercept-only) model  
224 that represents the case where none of these variables explains the probability of getting infected  
225 by any of the three *Plasmodium* parasites (Table S10). The models were fitted using maximum  
226 likelihood applying the nnet package in R (Venables & Ripley, 2002).

### 227 **3. RESULTS**

#### 228 **3.1. Long-term dynamics in probability of infection**

229 A total of 8055 *Anolis gundlachi* lizards were sampled in 13 surveys over a 26-year period. The  
230 most parsimonious model explaining variability in the individual probability of infection  
231 included the additive effect of sex, SVL, season, year, and the interaction between sex and SVL  
232 ( $\Delta\text{AICc} = 8.58$  between this model and the next best,  $\text{AICc weight} = 0.99$ ; Appendix Table S1).  
233 In the summer, the probability of infection and prevalence were relatively stable from 1990–  
234 1998 (Figure S1) with an estimated individual probability of infection fluctuating between 0.27–  
235 0.39 for males and 0.17–0.27 for females. The probability of infection decreased during the  
236 2015–2016 period to 0.10–0.17 for males and 0.06–0.10 for females (Figure 2a, Table S2). In the  
237 winter, the probability of infection and prevalence was low in 1991 (Figure S1; average  
238 probability of infection of 0.15 in males, and 0.09 in females). Then it increased and remained

239 stable from 1997–2002 with an individual probability of infection fluctuating between 0.28–0.39  
240 in males and 0.18–0.26 in females. This apparent stability was disrupted in 2016 where the  
241 probability of infection decreased (average probability of infection of 0.14 in males, and 0.08 in  
242 females; Figure S1, Figure 2b, Table S2).

### 243 **3.2 Environmental drivers of temporal variability**

244 The most parsimonious model explaining temporal variations in the proportion of infected  
245 individuals through time included the additive quadratic effect of mean maximum daily  
246 temperature and mean daily rainfall through 120 days before the sampling ( $\Delta\text{AICc} = 90.37$   
247 between this model and the next best, AICc weight = 1; Table S3). The probability of infection  
248 followed a nonlinear response with temperature and rainfall in which the proportion of infected  
249 individuals was maximized at an intermediate measure of temperature ( $\sim 26^\circ$ ; Figure 3a, Table  
250 S4,) and rainfall ( $\sim 9.6$  mm; Figure 3b).

### 251 **3.3 Environment-mediated effects of infection on body condition**

252 The most parsimonious model explaining the relationship between body condition ( $R_i$ ) of  
253 females and abiotic variables included a quadratic additive effect of mean daily maximum  
254 temperatures 30 days before the survey, cumulative rain six months before the survey, and  
255 infection state ( $\Delta\text{AICc} = 2.08$  between this model and the next best, AICc weight = 0.74; Table  
256 S5). This model predicts a non-linear partial relationship between body condition and  
257 cumulative rainfall that maximizes at  $\sim 1340$  mm for infected and non-infected females and  
258 declines for higher magnitudes of cumulative rainfall (Figure 4a). This model also predicts a  
259 non-linear partial relationship between body condition and mean maximum temperature. In this  
260 partial relationship, non-infected females had a better body condition (positive residuals) than

261 infected ones (negative residuals; Figure 4b, Table S6). The most parsimonious model explaining  
262 these relationships for males did not include infection state ( $\Delta\text{AICc} = 2.01$  between this model  
263 and the next best,  $\text{AICc}$  weight = 0.71; Table S7, S8; Figure S2).

### 264 **3.4 Long-term changes in parasite species composition**

265 The most parsimonious model explaining the probability of an individual being non-infected, or  
266 infected by *P. azurophilum*, *P. leucocytica*, or *P. floridense* was best described by the additive  
267 effect of SVL, sex and year ( $\Delta\text{AICc} = 3.29$  between this model and the next best,  $\text{AICc}$  weight =  
268 0.79; Table S9). This model predicts a decrease in the probability of infection of all *Plasmodium*  
269 parasites after 2001 (Figure 5, Table S10). Thus, the marked decrease in the probability of  
270 infection and prevalence during the most recent sample periods (Figure S1) was not due to only  
271 one species of parasite declining, but an overall decline. The most common infecting species was  
272 consistently *P. azurophilum*, which remained at a similar proportion of all infections throughout  
273 the 26-year period. The remaining parasite species, *P. floridense* and *P. leucocytica* changed  
274 their relative dominance, but this apparently was due to a secular decline in *P. floridense* over the  
275 entire study period (Figure 5, Table S10). This model predicted no differences in the partial  
276 relationship between SVL and probability of infection by the different *Plasmodium* parasites  
277 (Figure S3). Whereas the model predicts little differences between sexes in the probability of  
278 getting infected by *P. azurophilum*, or *P. floridense*, the probability of getting infected by *P.*  
279 *leucocytica* was greater in females (Figure S4).

## 280 **4. DISCUSSION**

281 We assembled a long-term data set spanning 26 years to explore the dynamics of three malaria  
282 parasites and their single vertebrate host species. This is one of the longest such studies on a

283 natural system of a vector-borne parasite infecting a nonhuman host (see also Schall & St. Denis,  
284 2013). Our results show that the probability of infection for the anole by *Plasmodium* parasites  
285 varied little early in the study despite several short droughts and hurricane events. This  
286 probability of infection, though, declined substantially during the most recent years. The recent  
287 drop in infection probability coincided with a severe drought in Puerto Rico. However, the  
288 long-term approach allowed detection of more subtle, but important patterns. Overall, temporal  
289 variation in probability of infection was associated with fluctuations in temperature and rainfall  
290 four months before each sampling period. The relationship with both environmental variables  
291 was nonlinear such that maximum probability of infection is predicted at an intermediate  
292 temperature and rainfall. Thus, if climate change results in an increase in temperature or rainfall,  
293 that may well result in a decrease the prevalence of all three parasites, contrary to common  
294 intuition. Similarly, this long-term analysis showed that host body condition maximized at  
295 intermediate levels of maximum temperature and rainfall. Moreover, noninfected females had a  
296 better body condition in the partial relationship with temperature. During the study period, *P.*  
297 *azurophilum* was consistently the most common parasite, but *P. floridense* declined slowly.  
298 Overall, these patterns were not apparent during the early years of the study (Schall, Pearson &  
299 Perkins, 2000); thus, a longer-term approach (> 10 yrs) was needed to reveal the true response of  
300 the parasite dynamics to environmental changes and its consequences.

301         The delayed link between rainfall and temperature with parasite prevalence (120 days)  
302 most likely is a consequence of shifting vector abundance and biting behavior. While the  
303 identity of the vector(s) of the three parasite species is not yet known, *P. floridense* is known to  
304 infect *Culex* mosquitoes in Florida (Klein et al., 1987) and is the most common mosquito genus  
305 at the site (Yee, D unpublished). During the severe 2015 drought, we noted an overall dry aspect

306 to the forest, with little standing water in puddles, *Heliconia* flowers, or epiphytic bromeliads  
307 that could have restricted breeding locations for mosquitoes. Most strikingly, despite the general  
308 effect of variation in temperature and humidity over the 26-year period, no dramatic effect on  
309 prevalence was seen after short environmental disruptions from dry periods or severe hurricanes  
310 during the first 10 years of the study period. Hurricanes caused severe physical damage to the  
311 forest including massive defoliation (Reagan & Waide, 1996; Schall, Pearson & Perkins, 2000).  
312 Thus, the drop in the probability of infection in the later samples could indicate that the 2015  
313 drought was of sufficient duration and strength to shift the system to a new dynamic state.  
314 Substantial theory and empirical evidence support the conclusion that natural ecological systems  
315 can experience such alternative stable states (Reagan, 1991; Petraitis, 2013).

316         What caused the differences in parasite prevalence for the summer vs. winter seasons?  
317 Rainfall is greater in the summer, which increases potential habitats for vector breeding,  
318 increasing the ratio of vectors to hosts. Also, summer is the mating season for *A. gundlachi*  
319 when lizards are more active and defending territories (Gorman & Licht, 1974; Reagan, 1992).  
320 If the vectors are daytime active, the lizards could be more exposed to vector bites.  
321 Alternatively, the lower prevalence in winter may be only apparent, if the parasite reduces  
322 reproduction in the lizard blood when vector activity ceases. There is no evidence that lizards  
323 can clear an infection. Also, using a PCR-based method to detect very low-parasitemia  
324 infections showed cryptic infections were more common in the winter season (unpublished).

325         Our study adds to the growing evidence that the relationship between malaria  
326 transmission and climatic measures is complex and often nonlinear (Garamszegi, 2011,  
327 Mordecai et al., 2013). The observed patterns could be the result of complex interactions  
328 between variation in environmental conditions and its effects on various stages in the

329 transmission process. Variations in temperature and rainfall can affect host susceptibility, which  
330 is particularly important in ectothermic hosts such as anoles. It can also affect vector abundances,  
331 biting rates, the probability of infection from host to vector and from vector to host, vector death  
332 rates, incubation periods, and recovery rates (Smith et al., 2012). Adding to this complexity is the  
333 role of spatial scale. For example, in the *Sceloporus occidentalis- Plasmodium mexicanum*  
334 system in California, when studying the relationship between landscape features and infection  
335 prevalence, the type of ground cover (grass, rocks, and leaf litter) affected the probability of  
336 capturing infected lizards (Eisen & Wright 2001). Note that changes in temperature and rainfall  
337 could alter microhabitat quality, including the production of leaf litter and ground cover. Thus,  
338 suggestions that rising temperatures alone will increase the prevalence of malaria parasites  
339 ignore the more complex story.

340         Temperature and rainfall also mediated *Anolis* body condition. Measures of body  
341 condition are commonly used as a proxy of the energetic state of lizards and their fitness (Peig  
342 and Green, 2009, Cox & Calsbeek, 2015). The host *A. gundlachi* is a thermoconformer shaded  
343 forest specialist whose metabolic performance depends closely on temperature (Huey &  
344 Webster, 1976). We found both females and males had an optimal body condition at ~27 °C,  
345 which is consistent with the experimental voluntary maximum temperature tolerated by the  
346 species (Hertz et al., 1993). The non-linear relationship between *A. gundlachi*'s body condition  
347 and rainfall likely reflects the balance between levels of rainfall that promote abundance of food  
348 resources and higher rainfall levels that result from hurricane disturbance. The highest recorded  
349 cumulative rainfall was 2013 mm recorded in 1998 during Hurricane Georges. Therefore, the  
350 decrease in body condition with increasing cumulative rainfall may be the result of physiological  
351 stress due to hurricane disturbance.



352 Noninfected females had better body condition than infected ones in the partial  
353 relationship with temperature. Two non-mutually exclusive hypotheses may explain this pattern.  
354 *Plasmodium* infection may be less frequent in gravid females, which weigh more due to egg  
355 mass. This is supported by a study on *Anolis sagrei* that found ovariectomized females had a  
356 lower probability of infection by *Plasmodium* parasites (Cox et al. 2010). Alternatively,  
357 noninfected females may hold more fat resources. We also found no difference in body  
358 condition between infected and non-infected males. This is consistent with previous studies that  
359 found little evidence of a relationship between male lizard health and parasite infection in the  
360 Caribbean (Schall & Pearson 2000, Schall & Staats 2002), but contrasts with studies of lizard  
361 malaria in California or Africa (Schall 2002). This pattern in lizards may be explained by three  
362 non-mutually exclusive explanations. First, virulence to male hosts can be expressed in other  
363 traits that may not be captured by a body-condition index such as changes in aggressive behavior  
364 or stamina. Second, parasitemia of Caribbean *Plasmodium* species is lower than those of  
365 California or Africa (Schall pers obs.), which may result in a lower rate of blood cell turnover.  
366 Third, low virulence could be the result of lower transmission intensity as predicted by the theory  
367 of virulence evolution in host-parasite systems that have co-evolved for many generations  
368 (Ewald 1994). The pattern in avian malaria is similar where in some host species *Plasmodium*  
369 infection has negligible effects on body condition---mostly attributed to low parasitemia (e.g.  
370 Granthon & Williams 2017), but there are significant negative effects in other species leading to  
371 dramatic increases in mortality (e.g. van Riper, van Riper, Goff, Laird, 1986; Marzal, De Lope,  
372 Navarro, & Møller, 2005).

373 The El Verde lizard malaria system has an added interest because we could follow  
374 through time the relative proportions of three species of *Plasmodium* that infect a single lizard

375 host. Despite the major drop in the probability of infection during the later sample periods, and  
376 the major disruption of the forest by hurricanes in the early years, *P. azurophilum* remained at a  
377 constant higher proportion of infections. *P. floridense* gradually decreased over the years and  
378 switched proportion of infections with the third species, *P. leucocytica*. What could account for  
379 this secular change? These two species infected different cell classes (erythrocytes for *P.*  
380 *floridense* and several classes of white blood cells for *P. leucocytica*), and therefore are not likely  
381 to be competitors for within-host habitats, and are unlikely to cross-react with the immune  
382 system. The competitive interactions of malaria parasite species that exploit the same host are  
383 poorly studied (but see Schall & Bromwich, 1994). We suspect the explanation falls to the  
384 biology of the vectors, either different insect host species or how parasites may compete within a  
385 single vector. Similar parasite species turnovers have been observed in long-term studies of bird  
386 malaria. For instance, *Plasmodium* and *Haemoproteus* lineages in Caribbean birds show  
387 significant temporal variation at the scale of decades, which suggests frequent parasite's local  
388 colonization and extinction events (Fallon, Ricklefs, Latta, & Bermingham, 2004).

389         The most significant finding of this study is the value, even the necessity, of a long-term  
390 approach to understand the ecology of host-parasite systems. In our study, the cycle of parasites  
391 into hosts likely follows an annual pattern because the lizards live ~ 1 year. In human terms,  
392 with a lifespan of ~ 50 years in malarious zones, this would be equivalent to a 1300-year study.  
393 Studying the *A. gundlachi* - *Plasmodium* spp. system over decades allowed us to gain a better  
394 picture of the patterns and possible mechanisms behind prevalence changes, shifts in the blood  
395 parasite community, and the effects on the body condition of the hosts. The influence of  
396 environmental variables became apparent only after taking this long-term approach.

## 397 **ACKNOWLEDGMENTS**

398 MAA and LO were supported by the University of Puerto Rico Fondo Institucional para la  
399 Investigación (FIPI) from the University of Puerto Rico and a grant from the Puerto Rico  
400 Science and Technology Trust. JJS was supported by the USA National Science Foundation. We  
401 thank the NSF-LTER group at El Verde for providing lodging and logistics. We thank Stephanie  
402 Aguila, Judith Reyes, David Clark, Laura Davo, Ashleigh Farmer, Adriana Ortiz, Víctor Ramos  
403 and Norberto Torres for their help in the field. This research was conducted under permits of  
404 Institutional Animal Care and Use Committee protocols from the University of Puerto Rico.

#### 405 **AUTHOR CONTRIBUTIONS**

406 LO, JSS, VC, KA and MAA conceived the project, designed the methodology and collected the  
407 data; LO, and MAA analyzed the data; LO, JSS, and MAA led the writing of the manuscript. All  
408 authors contributed critically to the drafts and gave final approval for publication.

409 **Data accessibility.** Body condition and infection data will be archived in Dryad and the  
410 environmental data is available from the PR-LTER website  
411 (<https://portal.lternet.edu/nis/home.jsp>). The code is available on github (maacevedo/Long-  
412 term\_anolis\_malaria).

413

414 **REFERENCES**

- 415 Altizer, S., Ostfeld, R.S., Johnson, P.T., Kutz, S., & Harvell, C.D. (2013). Climate change and  
416 infectious diseases: from evidence to a predictive framework. *Science*, **341**, 514–519.  
417 <https://doi.org/10.1126/science.1239401>
- 418 Aron, J.L., & May, R.M. (1982). The population dynamics of malaria. In R.M. Anderson (Eds.),  
419 The population dynamics of infectious diseases: Theory and applications (pp. 139-179).  
420 London, U.K: Chapman and Hall. [https://doi.org/10.1007/978-1-4899-2901-3\\_5](https://doi.org/10.1007/978-1-4899-2901-3_5)
- 421 Beadell, J.S., Ishtiaq, F., Covas, R., Melo, M., Warren, B.H., Atkinson, C.T., Bensch, S., Graves,  
422 G.R., Jhala, Y.V., Peirce, M.A. & Rahmani, A.R. (2006). Global phylogeographic limits of  
423 Hawaii's avian malaria. *Proceedings of the Royal Society of London B*, **273**, 2935-2944.  
424 <https://doi.org/10.1098/rspb.2006.3671>.
- 425 Bensch, S., Waldenström, J., Jonzén, N., Westerdahl, H., Hansson, B., Sejberg, D. &  
426 Hasselquist, D. (2007). Temporal dynamics and diversity of avian malaria parasites in a single  
427 host species. *Journal of Animal Ecology*, **76**, 112-122. [https://doi.org/10.1111/j.1365-  
428 2656.2006.01176.x](https://doi.org/10.1111/j.1365-2656.2006.01176.x)
- 429 Betini, G.S., Avgar, T., & Fryxell, J.M. (2017). Why are we not evaluating multiple competing  
430 hypotheses in ecology and evolution? *Royal Society Open Science*, **4**, 160756.  
431 <https://doi.org/10.1098/rsos.160756>
- 432 Campbell-Lendrum, D., Manga, L., Bagayoko, M., Sommerfeld, J. (2015). Climate change and  
433 vector-borne diseases: what are the implications for public health research and policy?

- 434 *Philosophical Transactions of the Royal Society B*, **370**, 20130552.
- 435 <https://doi.org/10.1098/rstb.2013.0552>
- 436 Chamberlin, T.C. (1890). The method of multiple working hypotheses. *Science*, **15**, 92-96.
- 437 Chiyaka, C., Tatem, A.J., Cohen, J.M., Gething, P.W., Johnston, G., Gosling, R., Laxminarayan,  
438 R., Hay, S.I. & Smith, D.L. (2013). The stability of malaria elimination. *Science*, **339**, 909-910.
- 439 <https://doi.org/10.1126/science.1229509>
- 440 Clutton-Brock, T. & Sheldon, B.C. (2010). Individuals and populations: the role of long-term,  
441 individual-based studies of animals in ecology and evolutionary biology. *Trends in Ecology &*  
442 *Evolution*, **25**, 562-573. <https://doi.org/10.1016/j.tree.2010.08.002>
- 443 Cox, R. M., Parker, E. U., Cheney, D. M., Liebl, A. L., Martin, L. B., & Calsbeek, R. (2010).  
444 Experimental evidence for physiological costs underlying the trade-off between reproduction and  
445 survival. *Functional Ecology*, **24**, 1262-1269. <https://doi.org/10.1111/j.1365-2435.2010.01756.x>
- 446 Cox, R.M. & Calsbeek, R. (2015). Survival of the fattest? Indices of body condition do not  
447 predict viability in the brown anole (*Anolis sagrei*). *Functional Ecology*, **29**, 404-413.
- 448 <https://doi.org/10.1111/1365-2435.12346>
- 449 Eisen, R. J., & Wright, N. M. (2001). Landscape features associated with infection by a malaria  
450 parasite (*Plasmodium mexicanum*) and the importance of multiple scale studies. *Parasitology*,  
451 **122**, 507-513. <https://doi.org/10.1017/S0031182001007636>
- 452 Elliott, L.P., & Brook, B.W. (2007). Revisiting Chamberlin: multiple working hypotheses for the  
453 21st century. *BioScience*, **57**, 608-614. <https://doi.org/10.1641/B570708>

- 454 Fallon, S.M., Ricklefs, R.E., Latta, S.C. & Bermingham, E. (2004). Temporal stability of insular  
455 avian malarial parasite communities. *Proceedings of the Royal Society of London B*, **271**, 493-  
456 500. [https://doi.org/ 10.1098/rspb.2003.2621](https://doi.org/10.1098/rspb.2003.2621)
- 457
- 458 Garamszegi, L.Z. (2011). Climate change increases the risk of malaria in birds. *Global Change*  
459 *Biology*, **17**, 1751-1759. <https://doi.org/10.1111/j.1365-2486.2010.02346.x>
- 460 Gorman, G. C., & Licht, P. (1974). Seasonality in ovarian cycles among tropical Anolis lizards.  
461 *Ecology*, **55**, 360-369. <https://doi.org/10.2307/1935223>
- 462 Granthon, C., & Williams, D. A. (2017). Avian malaria, body condition, and blood parameters in  
463 four species of songbird. *The Wilson Journal of Ornithology*, **129**, 492-508.  
464 <https://doi.org/10.1676/16-060.1>
- 465 Hackett, L. W. (1937). *Malaria in Europe: an Ecological Study*. Oxford: Oxford University  
466 Press.
- 467 Harvell, C.D., Mitchell, C.E., Ward, J.R., Altizer, S., Dobson, A.P., Ostfeld, R.S. & Samuel,  
468 M.D. (2002). Climate warming and disease risks for terrestrial and marine biota. *Science*, **296**,  
469 2158-2162. <https://doi.org/10.1126/science.1063699>
- 470 Hertz, P. E., Huey, R. B., & Stevenson, R. D. (1993). Evaluating temperature regulation by field-  
471 active ectotherms: the fallacy of the inappropriate question. *The American Naturalist*, **142**, 796-  
472 818. <https://doi.org/10.1086/285573>
- 473 Huey, R. B., & Webster, T. P. (1976). Thermal biology of Anolis lizards in a complex fauna: the  
474 *Christatellus* group on Puerto Rico. *Ecology*, **57**, 985-994. <https://doi.org/10.2307/1941063>

475 Jordan, H.B., 1964. Lizard malaria in Georgia. *Journal of Eukaryotic Microbiology*, **11**, 562-566.

476 <https://doi.org/10.1111/j.1550-7408.1964.tb01799.x>

477 Klein, T. A., Young, D. G., & Telford, J. S. (1987). Vector incrimination and experimental  
478 transmission of *Plasmodium floridense* by bites of infected *Culex* (Melanoconion) erraticus.

479 *Journal of the American Mosquito Control Association*, **3**, 165-175.

480

481 Lindenmayer, D.B. & Likens, G.E. (2009). Adaptive monitoring: a new paradigm for long-term  
482 research and monitoring. *Trends in Ecology & Evolution*, **24**, 482-486.

483 <https://doi.org/10.1016/j.tree.2009.03.005>

484 Lively, C.M., de Roode, J.C., Duffy, M.A., Graham, A.L. & Koskella, B., (2014). Interesting  
485 open questions in disease ecology and evolution. *The American Naturalist*, **184**, S1-S8.

486 <http://doi.org/10.1086/677032>.

487 Loiseau, C., Harrigan, R.J., Cornel, A.J., Guers, S.L., Dodge, M., Marzec, T., Carlson, J.S.,  
488 Seppi, B. & Sehgal, R.N., (2012). First evidence and predictions of *Plasmodium* transmission in  
489 Alaskan bird populations. *PLoS One*, **7**, e44729. <https://doi.org/10.1371/journal.pone.0044729>

490 Macdonald, G. (1952). The analysis of equilibrium in malaria. *Tropical Diseases Bulletin*, **49**,  
491 813-829.

492 Martinsen, E.S., Perkins, S.L., & Schall J.J. (2008). A three-genome phylogeny of malaria  
493 parasites (*Plasmodium* and closely related genera): Evolution of life-history traits and host  
494 switches. *Molecular Phylogenetics and Evolution*, **47**, 261–273.

495 <https://doi:10.1016/j.ympev.2007.11.012>

496 Martinsen, E.S., Sidor, I.F., Flint, S., Cooley, J. & Pokras, M.A. (2017). Documentation of  
497 Malaria Parasite (*Plasmodium* spp.) Infection and Associated Mortality in a Common Loon  
498 (*Gavia immer*). *Journal of Wildlife Diseases*, **53**, 859-863. <https://doi.org/10.7589/2016-08-195>

499 Marzal, A., De Lope, F., Navarro, C., & Møller, A. P. (2005). Malarial parasites decrease  
500 reproductive success: an experimental study in a passerine bird. *Oecologia*, **142**, 541-545.

501 Mordecai, E.A., Paaijmans, K.P., Johnson, L.R., Balzer, C., Ben-Horin, T., Moor, E., McNally,  
502 A., Pawar, S., Ryan, S.J., & Smith, T.C. 2013 Optimal temperature for malaria transmission is  
503 dramatically lower than previously predicted. *Ecology Letters*, **16**, 22–30. doi:10.1111/ele.12015

504 Paaijmans, K.P., Blanford, S., Bell, A.S., Blanford, J.I., Read, A.F., & Thomas, M.B. (2010).  
505 Influence of climate on malaria transmission depends on daily temperature variation.  
506 *Proceedings of the National Academy of Sciences*, **107**, 15135–15139.  
507 <https://doi.org/10.1073/pnas.1006422107>

508 Pascual, M., Ahumada, J.A., Chaves, L.F., Rodo, & X., Bouma, M. (2006). Malaria resurgence  
509 in the East African highlands: temperature trends revisited. *Proceedings of the National*  
510 *Academy of Sciences*, **103**, 5829–5834. <https://doi.org/10.1073/pnas.0508929103>

511 Peig, J., & Green, A. J. (2009). New perspectives for estimating body condition from  
512 mass/length data: the scaled mass index as an alternative method. *Oikos*, **118**, 1883-1891.  
513 <https://doi.org/10.1111/j.1600-0706.2009.17643.x>

514 Petraitis, P.S. (2013). Multiple stable states in natural ecosystems. Oxford: Oxford University  
515 Press.



- 516 Pulgarín-R, P. C., Gómez, J. P., Robinson, S., Ricklefs, R. E., & Cadena, C. D. (2017). Host  
517 species, and not environment, predicts variation in blood parasite prevalence, distribution, and  
518 diversity along a humidity gradient in northern South America. *Ecology and Evolution*  
519 <https://doi.org/10.1002/ece3.3785>
- 520 R Core Team (2018). R: A language and environment for statistical computing. R Foundation for  
521 Statistical Computing, Vienna, Austria. <http://www.R-project.org/>.
- 522 Reagan, D. P. (1991). The response of Anolis lizards to hurricane-induced habitat changes in a  
523 Puerto Rican rain forest. *Biotropica*, **23**, 468-474. <https://doi.org/10.2307/2388268>
- 524 Reagan, D. P. (1992). Congeneric species distribution and abundance in a three-dimensional  
525 habitat: the rain forest anoles of Puerto Rico. *Copeia*, **1992**, 392-403.  
526 <https://doi.org/10.2307/1446199>
- 527 Reagan, D.P., & Waide, R.B. (1996). The food web of a tropical rain forest. University of  
528 Chicago Press.
- 529 Samuel, M. D., Hobbelen, P. H., DeCastro, F., Ahumada, J. A., LaPointe, D. A., Atkinson, C. T.,  
530 Woodworth, B.L., Hart, P. J. & Duffy, D. C. (2011). The dynamics, transmission, and population  
531 impacts of avian malaria in native Hawaiian birds: a modeling approach. *Ecological*  
532 *Applications*, **21**, 2960-2973. <https://doi.org/10.1890/10-1311.1>
- 533 Schall, J. J., & Bromwich, C. R. (1994). Interspecific interactions tested: Two species of malarial  
534 parasite in a west African lizard. *Oecologia*, **97**, 326-332.

- 535 Schall, J., Pearson, A. R., & Perkins, S. L. (2000) Prevalence of malaria parasites (*Plasmodium*  
536 *floridense* and *Plasmodium azurophilum*) infecting a Puerto Rican lizard (*Anolis gundlachi*): a  
537 nine-year study. *Journal of Parasitology*, **86**, 511-515. [https://doi.org/10.1645/0022-](https://doi.org/10.1645/0022-3395(2000)086[0511:POMPPF]2.0.CO;2)  
538 [3395\(2000\)086\[0511:POMPPF\]2.0.CO;2](https://doi.org/10.1645/0022-3395(2000)086[0511:POMPPF]2.0.CO;2)
- 539 Schall, J.J., & Pearson, A.R. (2000). Body condition of a Puerto Rican anole, *Anolis gundlachi*:  
540 Effect of a malaria parasite and weather variation. *Journal of Herpetology*, **34**, 489-491.  
541 <https://doi.org/10.2307/1565380>
- 542 Schall J.J. (2002). Parasite virulence. In *The behavioural ecology of parasites* (eds Lewis EC,  
543 James F, Sukhdeo MVK), pp. 283–313. New York, NY: CAB International
- 544 Schall, J.J., & Staats, C. M. (2002). Virulence of Lizard Malaria: Three Species of *Plasmodium*  
545 Infecting *Anolis sabanus*, the Endemic Anole of Saba, Netherlands Antilles. *Copeia*, **2002**, 39-  
546 43. [https://doi.org/10.1643/0045-8511\(2002\)002\[0039:VOLMTS\]2.0.CO;2](https://doi.org/10.1643/0045-8511(2002)002[0039:VOLMTS]2.0.CO;2)
- 547 Schall, J.J. & Denis, K.S. (2013). Microsatellite loci over a thirty-three year period for a malaria  
548 parasite (*Plasmodium mexicanum*): bottleneck in effective population size and effect on allele  
549 frequencies. *Parasitology*, **140**, 21-28. <https://doi.org/10.1017/S0031182012001217>
- 550 Snow, R.W., Sartorius, B., Kyalo, D., Maina, J., Amratia, P., Mundia, C.W., Bejon, P. & Noor,  
551 A.M. (2017). The prevalence of *Plasmodium falciparum* in sub-Saharan Africa since 1900.  
552 *Nature*, **550**, 515-518. <https://doi:10.1038/nature24059>
- 553 Telford, Jr. S.R. (2016) *Hemoparasites of the Reptilia: Color atlas and text*. CRC Press.

554 Templeton, T.J., Asada, M., Jiratanh, M., Ishikawa, S.A., Tiawsirisup, S., Sivakumar, T.,  
555 Namangala, B., Takeda, M., Mohkaew, K., Ngamjituea, S. & Inoue, N. (2016). Ungulate malaria  
556 parasites. *Scientific Reports*, 6, 23230. [https:// doi:10.1038/srep23230](https://doi.org/10.1038/srep23230)

557 van Riper, C., van Riper, S. G., Goff, M. L., & Laird, M. (1986). The epizootiology and  
558 ecological significance of malaria in Hawaiian land birds. *Ecological Monographs*, **56**, 327-344.  
559 <https://doi.org/10.2307/1942550>

560 Vasseur, D.A., DeLong, J.P., Gilbert, B., Greig, H.S., Harley, C.D., McCann, K.S., Savage, V.,  
561 Tunney, T.D., & O'Connor, M.I. (2014). Increased temperature variation poses a greater risk to  
562 species than climate warming. *Proceedings of the Royal Society of London B*, **281**, 20132612.  
563 <https://doi.org/10.1098/rspb.2013.2612>

564 Venables, W. N., & Ripley, B. D. (2002). *Modern Applied Statistics with S*. Fourth Edition.  
565 Springer, New York.

566 Wilkinson, L.C., Handel, C.M., Van Hemert, C., Loiseau, C. & Sehgal, R.N. (2016). Avian  
567 malaria in a boreal resident species: long-term temporal variability, and increased prevalence in  
568 birds with avian keratin disorder. *International Journal for Parasitology*, **46**, 281-290.  
569 <https://doi.org/10.1016/j.ijpara.2015.12.008>

570

571

572

573

574

575

576

577

## 578 FIGURE LEGENDS

579 **Figure 1.** (a) The host *Anolis gundlachi* is infected by three malaria parasites: (b) *Plasmodium*  
580 *azurophilum*, (c) *P. floridense*, and (d) *P. leucocytica*.

581 **Figure 2.** Figure presents the predicted partial relationship between probability of infection of  
582 *Anolis gundlachi* by three malarial parasites and time. This probability of infection is relatively  
583 constant in the early years but decreases in 2015–2016. Points represent mean estimates and bars  
584 95% confidence intervals.

585 **Figure 3.** Predictions of the most parsimonious model explaining temporal variation in the  
586 proportion of infected *Anolis gundlachi* by malaria parasites. This model predicted the  
587 proportion of infected individuals by the additive effect of squared (a) mean temperature and (b)  
588 mean daily rainfall 120 days before sampling. Lines represent estimated means and shaded areas  
589 95% confidence intervals.

590 **Figure 4.** Partial predictions from the most parsimonious model describing the relationship  
591 between *Anolis gundlachi* females body condition and (a) cumulative rain six months before the  
592 survey, and (b) mean daily temperature during the month previous to the survey. Note that in the  
593 predicted relationship there is no difference in body condition between infected and non-infected  
594 females with respect to cumulative rain, but non-infected females had better body condition than  
595 infected ones in the partial relationship with temperature.

596 **Figure 5.** Partial predictions from the most parsimonious multinomial model showing a general  
597 decrease through time in the probability of infection of *Anolis gundlachi* by three *Plasmodium*

598 parasites. The model predicts a decrease in the probability of infection by *P. floridense* in the last  
599 three censuses compared to *P. leucocytica*. Dots represent the infection probability estimates for  
600 each *Plasmodium* species and the bars represent 95% confidence intervals.

(a)

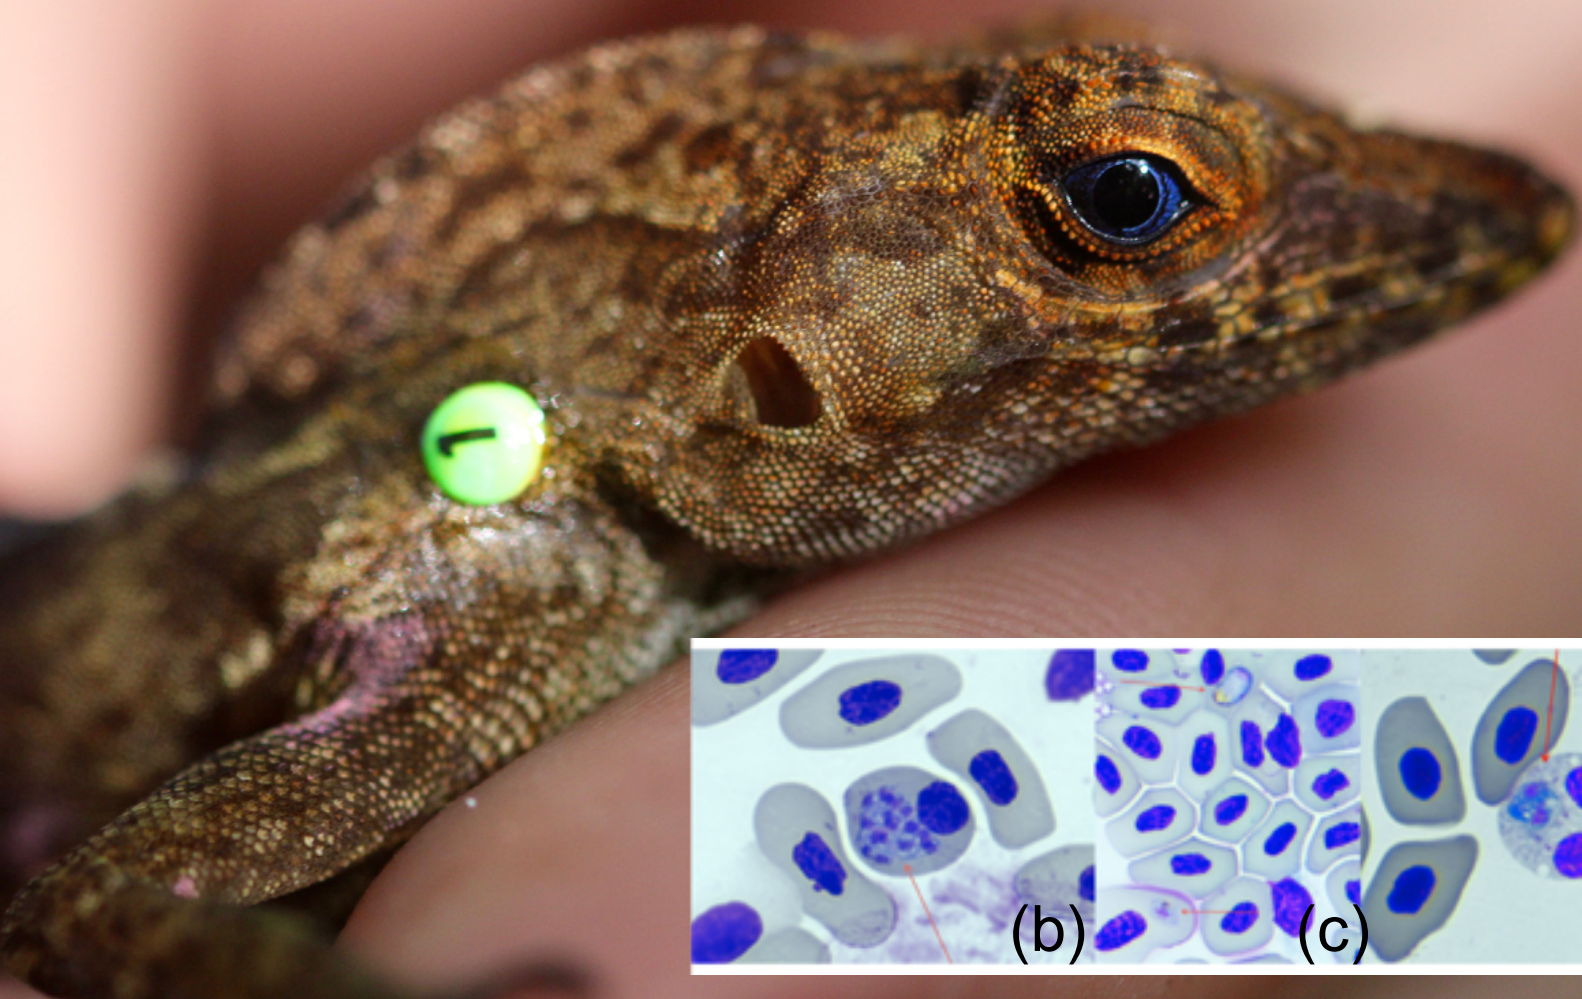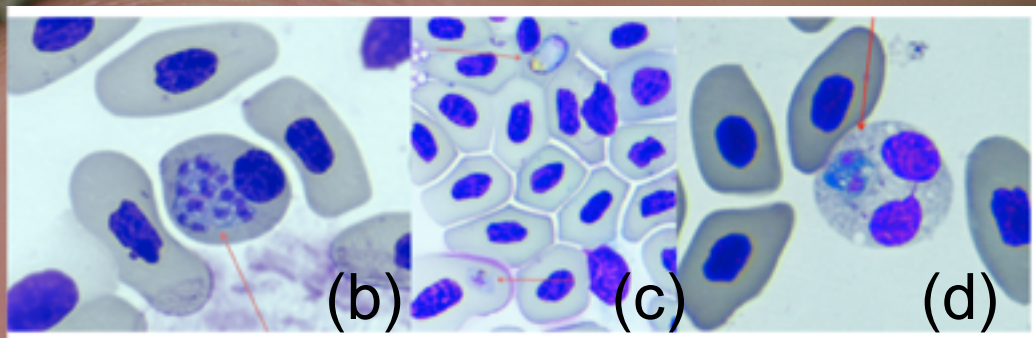

sex — females — males

(a) Summer

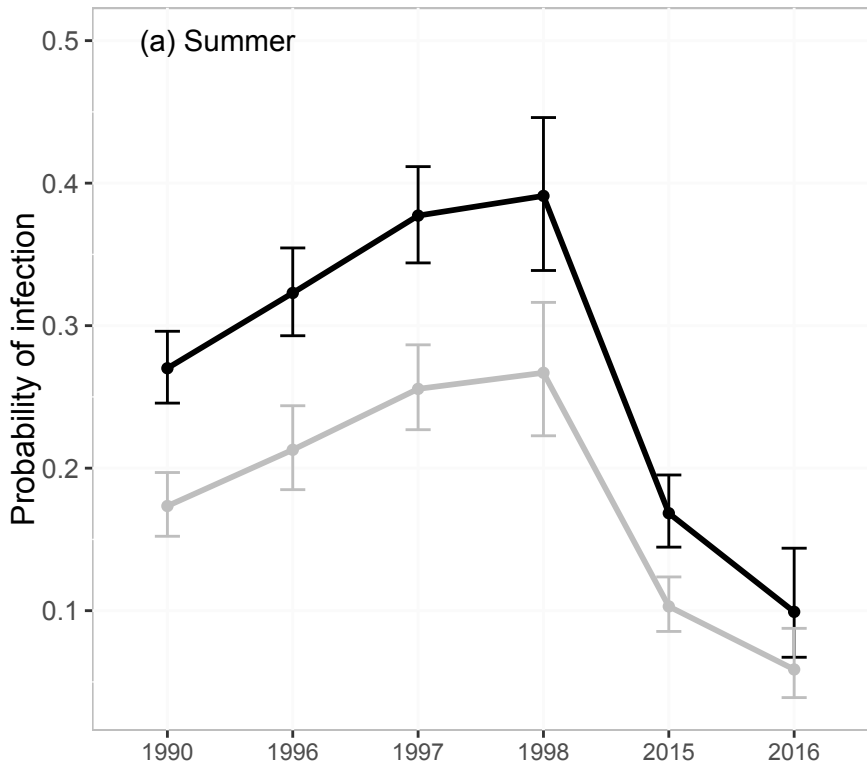

(b) Winter

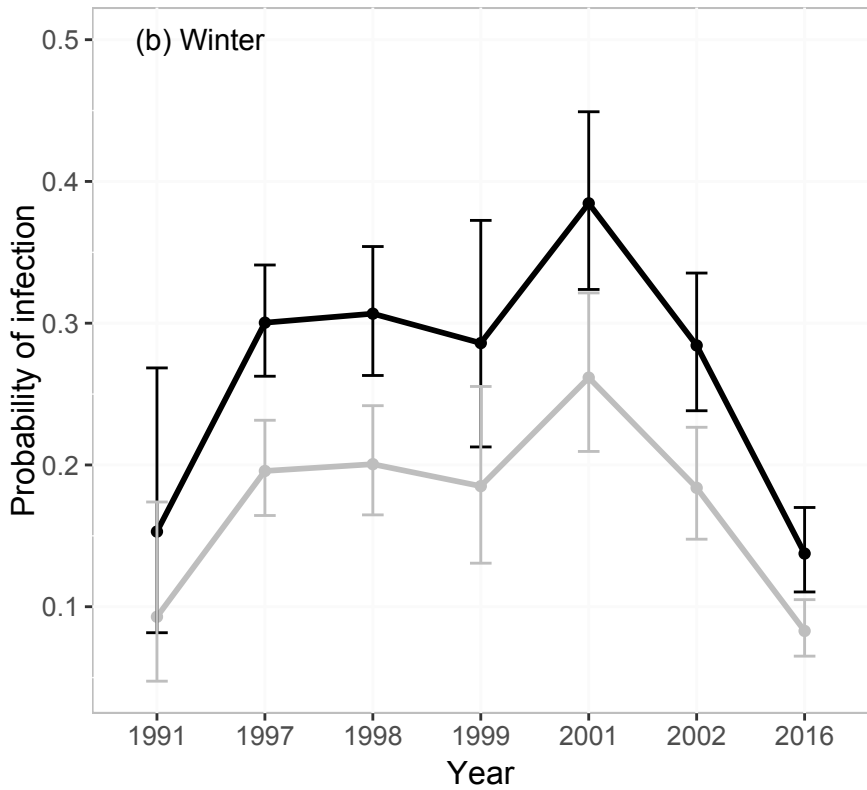

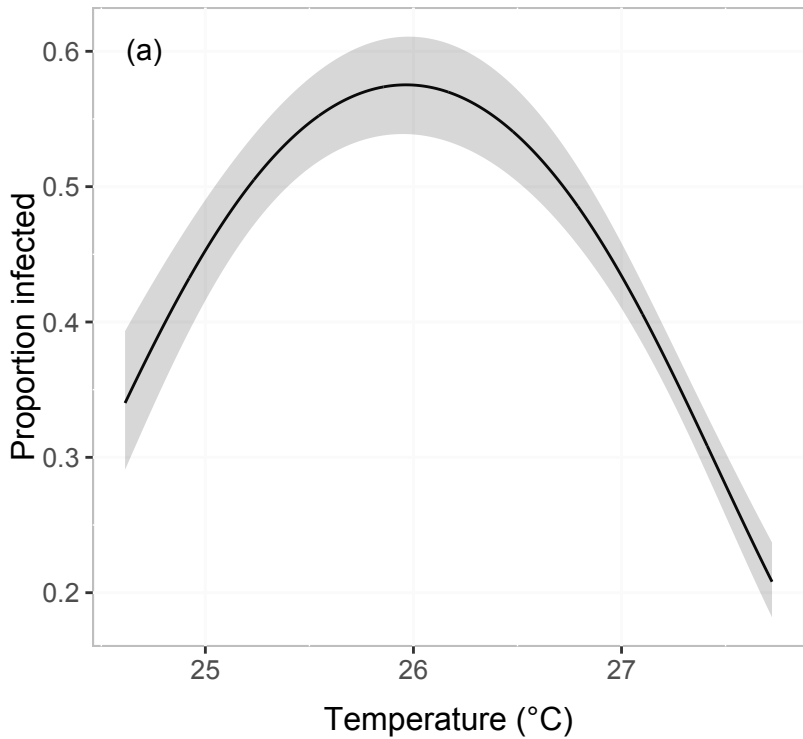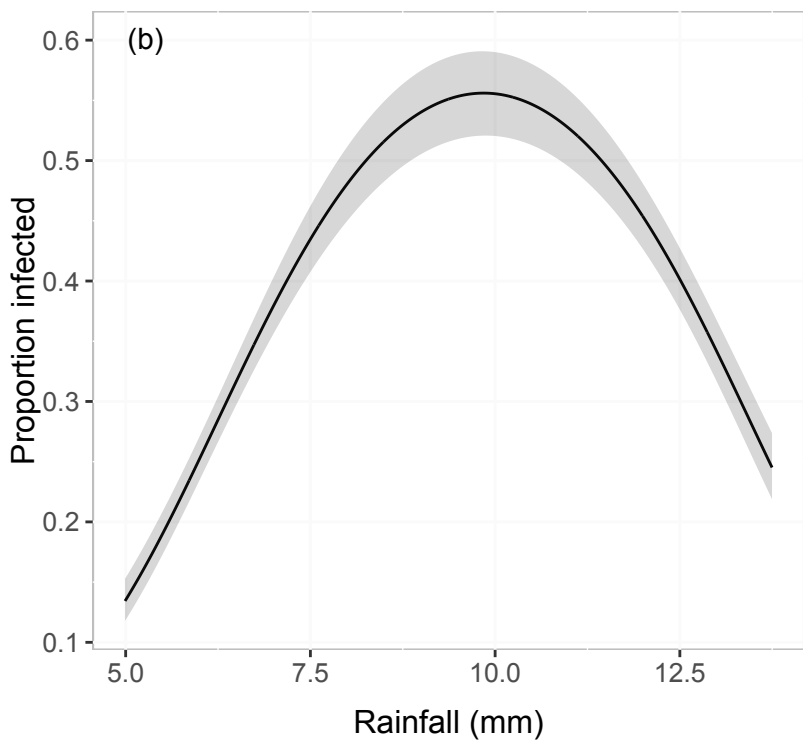



— Infected    - - - Non-Infected

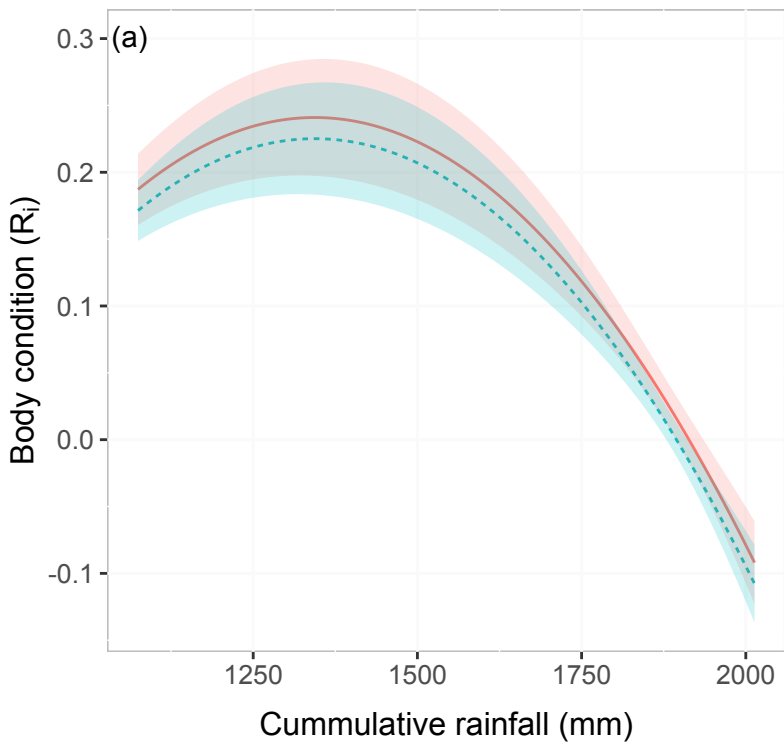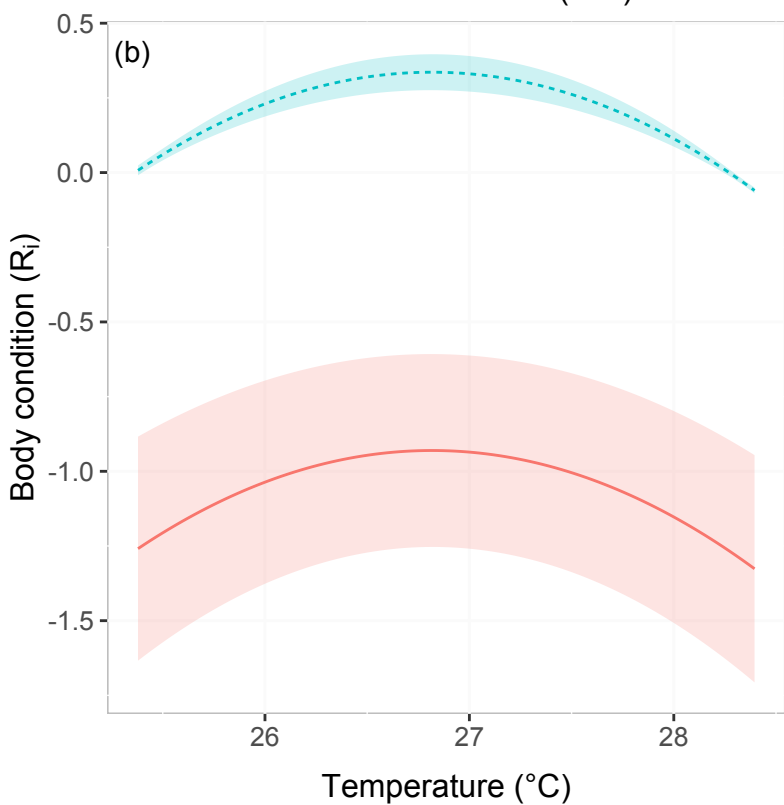

Species ● *P. azurophilum* ● *P. floridense* ● *P. leucocytica*

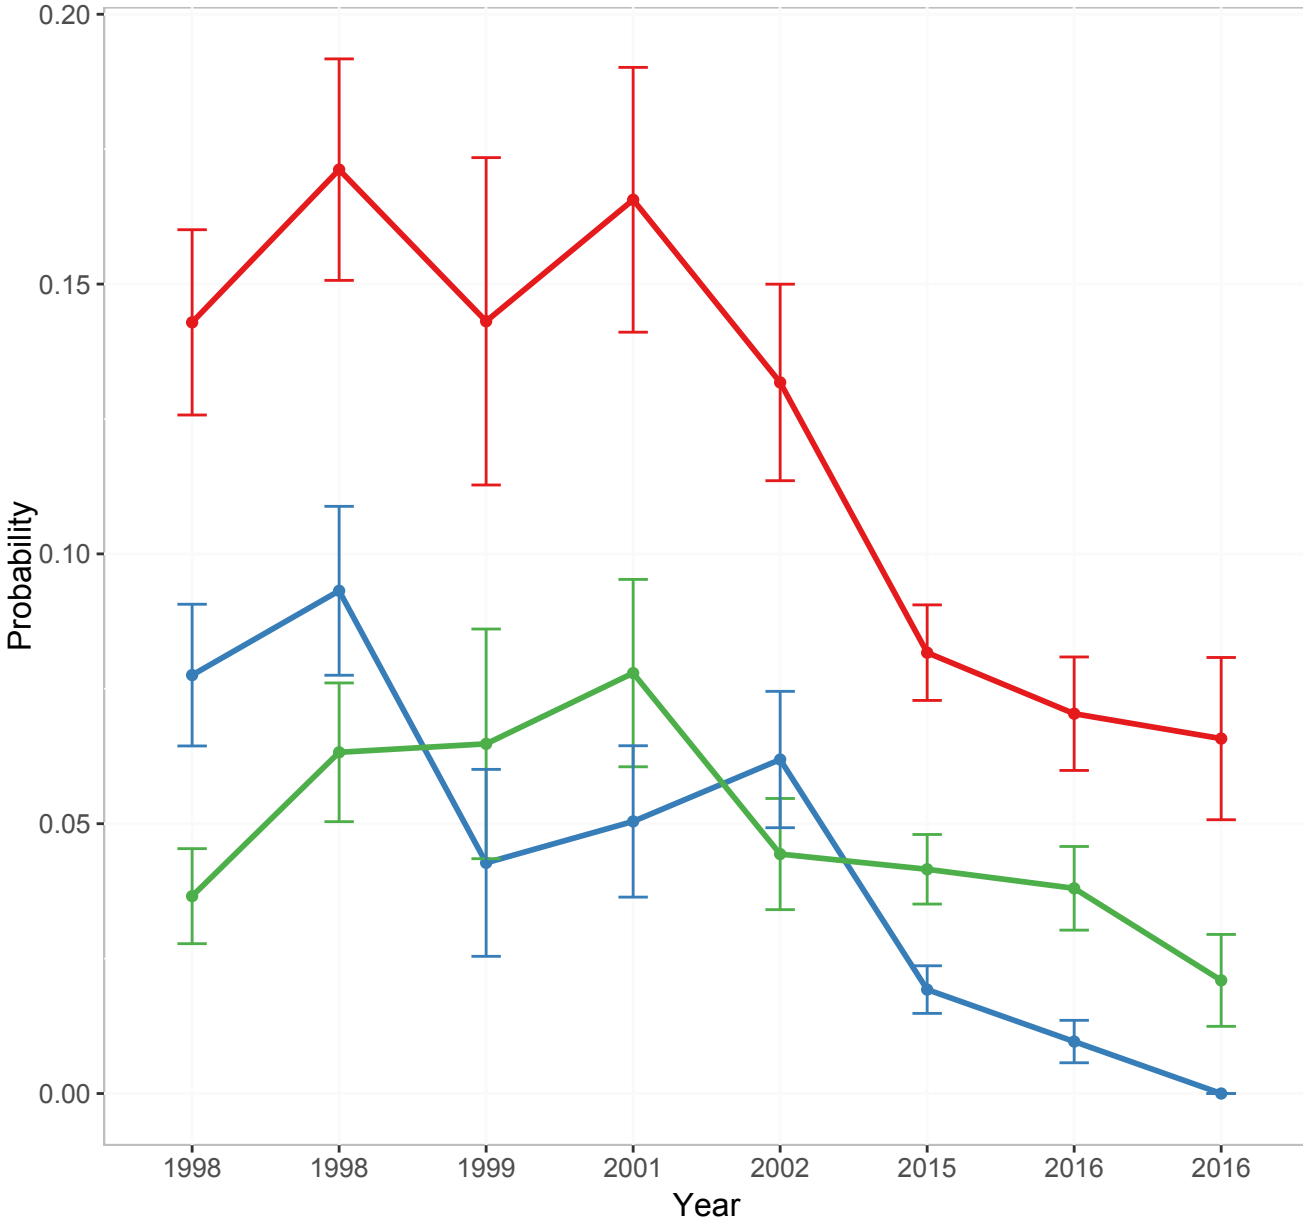

Source: http://biorxiv.org/content/10.1101/189696v2.full.pdf
